# Supplementary material
Source: PubMed Central journal article supplement (PMC6384113)
Supplement: AEM.02301-18-s0001.pdf [file AEM.02301-18-s0001.pdf]

1 **SUPPLEMENTARY MATERIAL**

2 **Genetic differences in floc formation among three closely related *Competibacteraceae* clades**  
3 **at a full-scale activated sludge wastewater treatment plant and putative linkages to process**  
4 **performance**

5

6 Veronica R. Brand<sup>a</sup>, Laurel D. Crosby<sup>b</sup>, Craig S. Criddle<sup>a,#</sup>

7

8 <sup>a</sup>Department of Civil and Environmental Engineering, Stanford University, Stanford, CA 94305

9 <sup>b</sup>Stanford Genome Technology Center, Palo Alto, CA 94304

10

11 #Corresponding author: Craig Criddle, [ccriddle@stanford.edu](mailto:ccriddle@stanford.edu)

12

13 Number of pages: 6

14 Number of Supplementary Tables: 2

15 Number of Supplementary Figures: 3

16

17 **Supplementary Tables**

18 **Table S1-** Average Nucleotide Identity (ANI) values for selected Competibacter-lineage  
 19 genomes. All groups listed are ‘*Candidatus.*’

|                                           | CPB_<br>P15<br>CA14.1 | CPB_<br>M38<br>CA23.2 | CA23.1 | C.<br>odensis<br>Run<br>BJ11 | Conten-<br>dobacter<br>sp. UBA<br>2788 | Compet-<br>ibacter<br>sp. UBA<br>3908 | Compet-<br>ibacter<br>sp. UBA<br>2792 | Compet-<br>ibacter<br>sp.1<br>UBA<br>2368 | C.<br>denit-<br>rificans<br>Run<br>AD11 | UBA<br>2383<br>UBA<br>2383 |
|-------------------------------------------|-----------------------|-----------------------|--------|------------------------------|----------------------------------------|---------------------------------------|---------------------------------------|-------------------------------------------|-----------------------------------------|----------------------------|
| CPB_P15 CA14.1                            | 1                     |                       |        |                              |                                        |                                       |                                       |                                           |                                         |                            |
| CPB_M38 CA23.2                            | 0.76                  | 1                     |        |                              |                                        |                                       |                                       |                                           |                                         |                            |
| CA23.1                                    | 0.77                  | 0.78                  | 1      |                              |                                        |                                       |                                       |                                           |                                         |                            |
| Contendobacter<br>odensis RunBJ11         | 0.77                  | 0.77                  | 0.76   | 1                            |                                        |                                       |                                       |                                           |                                         |                            |
| Contendobacter sp<br>UBA2788              | 0.77                  | 0.78                  | 0.77   | 0.86                         | 1                                      |                                       |                                       |                                           |                                         |                            |
| Competibacter sp<br>UBA3908               | 0.77                  | 0.79                  | 0.78   | 0.79                         | 0.80                                   | 1                                     |                                       |                                           |                                         |                            |
| Competibacter sp<br>UBA2792               | 0.75                  | 0.77                  | 0.75   | 0.76                         | 0.77                                   | 0.81                                  | 1                                     |                                           |                                         |                            |
| Competibacter sp1<br>UBA2368              | 0.75                  | 0.77                  | 0.76   | 0.76                         | 0.77                                   | 0.79                                  | 0.77                                  | 1                                         |                                         |                            |
| Competibacter<br>denitrificans<br>RunAD11 | 0.74                  | 0.75                  | 0.75   | 0.75                         | 0.75                                   | 0.77                                  | 0.75                                  | 0.77                                      | 1                                       |                            |
| UBA2383 UBA2383                           | 0.75                  | 0.75                  | 0.75   | 0.75                         | 0.75                                   | 0.76                                  | 0.74                                  | 0.74                                      | 0.73                                    | 1                          |

20 ANI values calculated using pyani (<https://github.com/widowquinn/pyani>) using the BLAST method

21

22 **Table S2-** Summary of Plant Data for 2014-2015

23

| Parameter                                             | n   | Range <sup>a</sup> | Average | Standard deviation |
|-------------------------------------------------------|-----|--------------------|---------|--------------------|
| Primary TSS, mg/L                                     | 407 | 110-2000           | 404.3   | 172.0              |
| Secondary TSS, mg/L                                   | 730 | 60-564             | 147.1   | 46.5               |
| Mixed Liquor TSS, mg/L                                | 730 | 1179-3907          | 2257    | 495                |
| Waste Return Activated Sludge TSS, mg/L               | 730 | 3618-13860         | 7402    | 1929               |
| Effluent TSS, mg/L                                    | 425 | 5-44               | 14.6    | 6.7                |
| Secondary Influent Flow, MGD                          | 730 | 43-170             | 58.1    | 16.8               |
| Recycle Rate                                          | 425 | 0.15-1.00          | 0.42    | 0.12               |
| Solids Retention Time, d                              | 730 | 0.7-3.5            | 1.54    | 0.42               |
| Mixed Liquor Volatile Suspended Solids, mg/L          | 206 | 600-4300           | 2024    | 621                |
| pH                                                    | 612 | 6.4-7.0            | 6.8     | 0.1                |
| Influent cBOD, mg/L                                   | 406 | 50-273             | 160.4   | 37.8               |
| Effluent cBOD, mg/L                                   | 418 | 3-36               | 9.8     | 4.0                |
| Dispersed large coccoid cells, abundance <sup>b</sup> | 233 | 0.5-6              | 2.79    | 1.30               |

24 <sup>a</sup>Range represents minimum and maximum values for full time period

25 <sup>b</sup>Abundance rated per Jenkins method (1)

26 **Supplementary Figures**

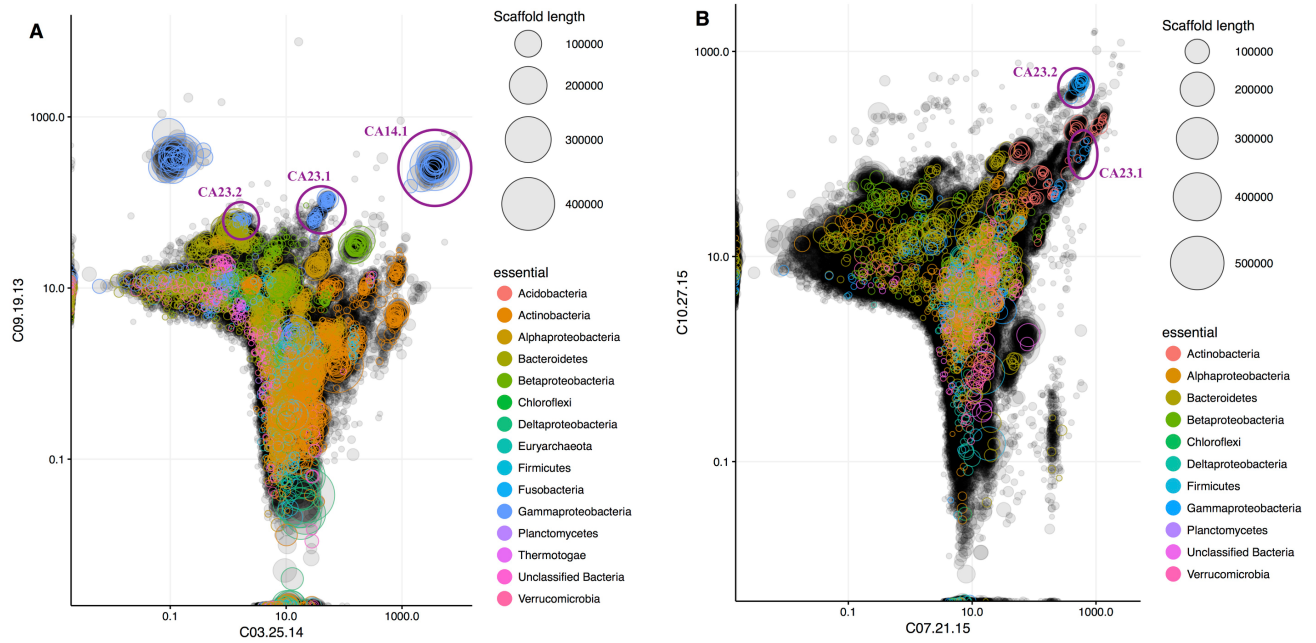

27

28

29 **Figure S1-** Contigs in metagenome samples from the Northern California plant. Coverage plots

30 for (A) samples 2014-03-25 and 2013-09-19, and (B) samples 2015-07-21 and 2015-10-27.

31 Extracted bins are marked. Contigs are colored by phyla based on predicted essential genes using

32 the ‘mmgenome’ workflow (2).

33

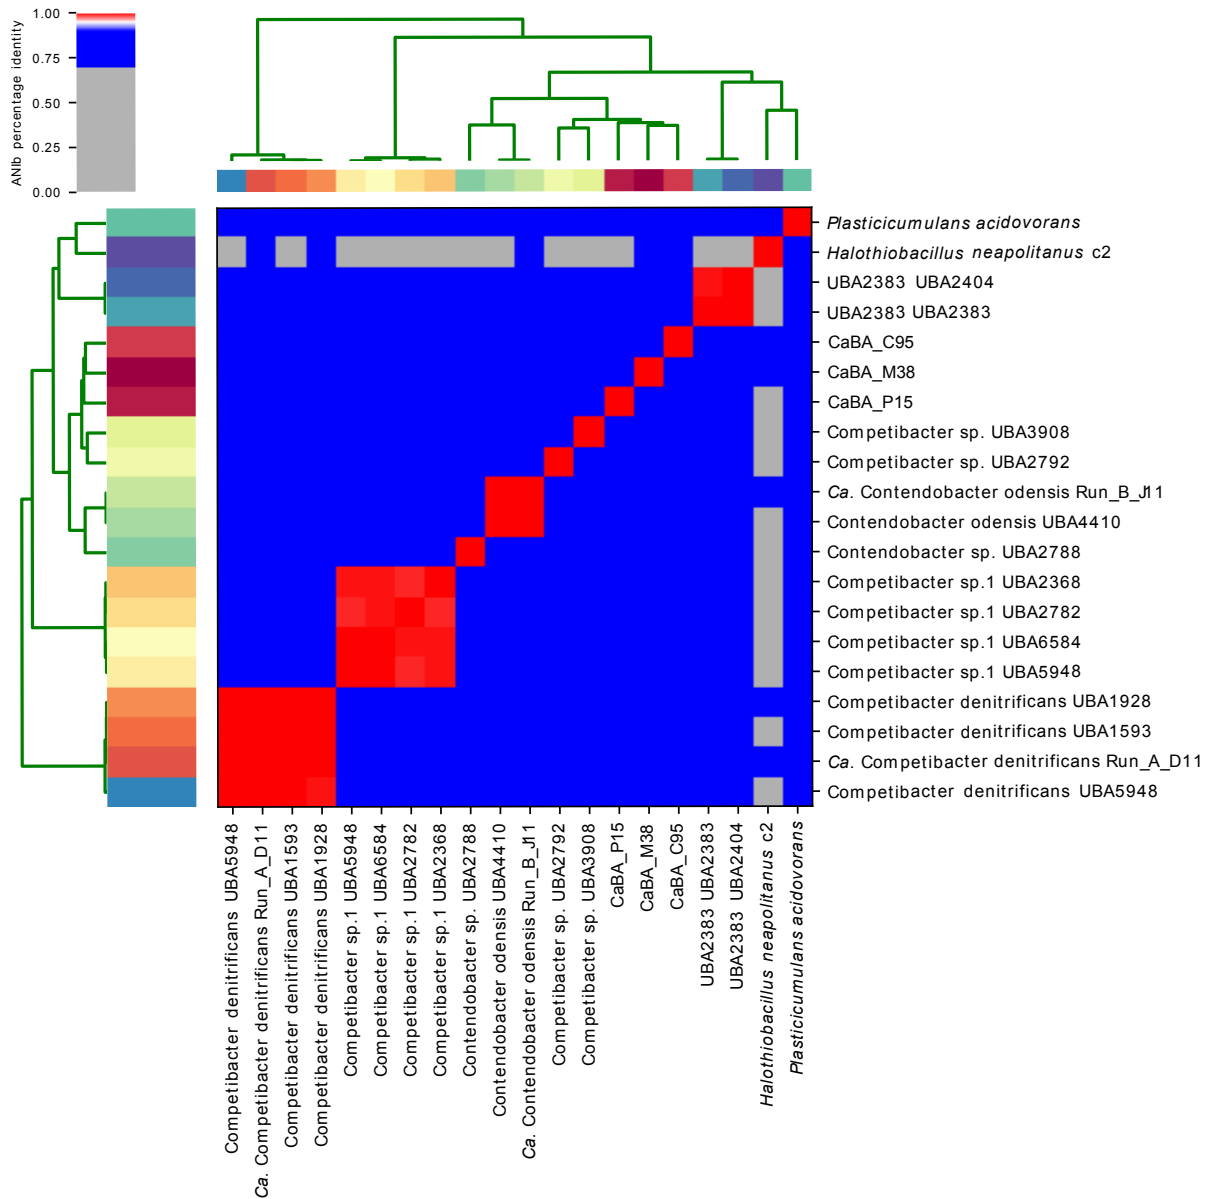

35

36 **Figure S2-** Average Nucleotide Identity plot of all available *Competibacteraceae* genomes (as of

37 June 2018). Plot produced with pyani (<https://github.com/widdowquinn/pyani>) using the BLAST

38 method.

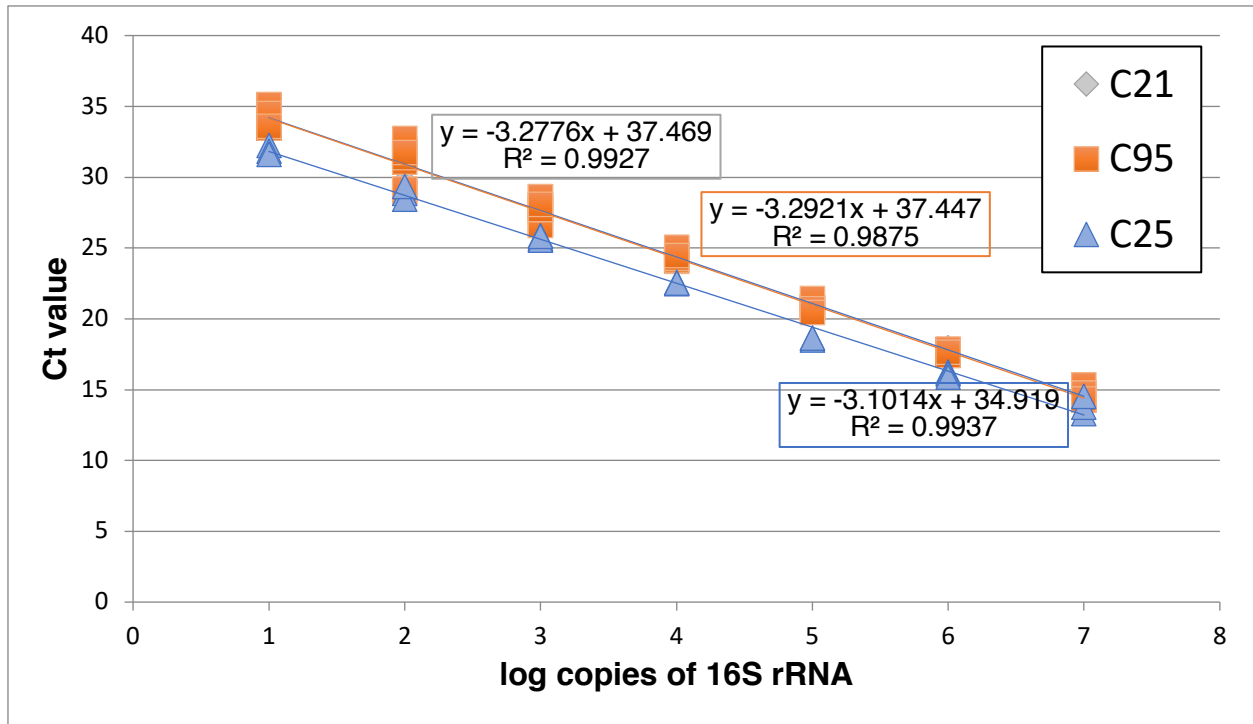

39

40

41 **Figure S3-** Standard curves for qPCR Assay. CaBA clone C21- CPB\_M38; CaBA clone C95-

42 CPB\_C95; CaBA clone C25- CPB\_P15.

43 **REFERENCES**

- 44 1. Jenkins D, Richard MG, Daigger GT. 2004. Manual on the causes and control of activated  
45 sludge bulking, foaming, and other solids separation problems. Lewis Publishers.
- 46 2. Karst SM, Kirkegaard RH, Albertsen M. 2016. mmgenome: a toolbox for reproducible  
47 genome extraction from metagenomes. bioRxiv 059121.

48
